# Supplementary material for: Customisation of the Exome Data Analysis Pipeline Using a Combinatorial Approach
Source: PubMed Central journal article supplement (PMC3253117; doi:10.1371/journal.pone.0030080), 2012-01-06
Supplement: pone.0030080.s005.pdf [file pone.0030080.s005.pdf]

Table S1: False Detection Rate table from the Ti/Tv metric.

| <b>Aligners</b> | <b>Sample</b> | <b>GATK</b> | <b>Samtools</b> | <b>Freebayes</b> | <b>Bambino</b> |
|-----------------|---------------|-------------|-----------------|------------------|----------------|
| <b>BWA</b>      | 02B           | 0.89        | 1.31            | 0.00             | 0.83           |
|                 | 12L           | 0.88        | 1.21            | 0.00             | 0.71           |
|                 | 20T           | 0.90        | 1.32            | 0.00             | 0.70           |
| <b>Bowtie</b>   | 02B           | 0.94        | 1.45            | 0.05             | 0.96           |
|                 | 12L           | 0.96        | 1.43            | 0.01             | 0.95           |
|                 | 20T           | 0.94        | 1.40            | 0.05             | 0.89           |
| <b>Bfast</b>    | 02B           | 0.89        | 1.24            | 0.00             | 0.82           |
|                 | 12L           | 0.89        | 1.18            | 0.00             | 0.78           |
|                 | 20T           | 0.89        | 1.18            | 0.00             | 0.73           |
| <b>Novo</b>     | 02B           | 0.91        | 1.09            | 0.88             | 0.95           |
|                 | 12L           | 0.90        | 1.10            | 0.85             | 0.94           |
|                 | 20T           | 0.91        | 1.12            | 0.88             | 0.93           |
| <b>SSAHA</b>    | 02B           | 0.90        | 1.21            | 0.00             | 0.84           |
|                 | 12L           | 0.90        | 1.18            | 0.00             | 0.79           |
|                 | 20T           | 0.90        | 1.19            | 0.00             | 0.70           |
| <b>Smalt</b>    | 02B           | 0.92        | 1.20            | 0.00             | 0.85           |
|                 | 12L           | 0.91        | 1.16            | 0.00             | 0.81           |
|                 | 20T           | 0.91        | 1.15            | 0.00             | 0.73           |
| <b>Stampy</b>   | 02B           | 0.91        | 1.11            | 0.75             | 0.92           |
|                 | 12L           | 0.90        | 1.12            | 0.70             | 0.89           |
|                 | 20T           | 0.90        | 1.12            | 0.75             | 0.88           |
