# Supplementary material for: Customisation of the Exome Data Analysis Pipeline Using a Combinatorial Approach
Source: PubMed Central journal article supplement (PMC3253117; doi:10.1371/journal.pone.0030080), 2012-01-06
Supplement: pone.0030080.s006.pdf [file pone.0030080.s006.pdf]

Table S2: The elapsed real time output estimated by time command for each aligner.

| Aligner   | Command Line                                                                                                                                                                                                                                                                                                         | Elapsed real (wall clock) time used by the process, in seconds. |
|-----------|----------------------------------------------------------------------------------------------------------------------------------------------------------------------------------------------------------------------------------------------------------------------------------------------------------------------|-----------------------------------------------------------------|
| Novocraft | novocraft/novoalign -d hg18_non_mpi.ndx -f<br>02B_1_6_1_split00_100Mb.fastq<br>02B_1_6_2_split00_100Mb.fastq -i PE 300,50 -a -F<br>ILMFQ -o SAM                                                                                                                                                                      | 2019.67                                                         |
| Bowtie    | bowtie-0.12.7/bowtie -q -n -a --best -p 1 -S hg18 -1<br>02B_1_6_1_split00_100Mb.fastq -2<br>02B_1_6_2_split00_100Mb.fastq                                                                                                                                                                                            | 29.18                                                           |
| Bwa       | bwa/bwa aln -t 1 hg_18.fa<br>02B_1_6_1_split00_100Mb.fastq                                                                                                                                                                                                                                                           | 1067.58                                                         |
|           | bwa/bwa aln -t 1 hg_18.fa<br>02B_1_6_2_split00_100Mb.fastq                                                                                                                                                                                                                                                           | 1170.83                                                         |
|           | /Apps/serial/bwa/bwa sampe hg_18.fa<br>02B_1_6_1_split00_100Mb.fastq.sai<br>02B_1_6_2_split00_100Mb.fastq.sai<br>02B_1_6_1_split00_100Mb.fastq<br>02B_1_6_2_split00_100Mb.fastq                                                                                                                                      | 25.24                                                           |
| Smalt     | smalt/smalt_x86_64 map -i 250 -f sam -n 1 -o<br>02B_1_6_100mb_smalt.sam hg18k13s6_smalt<br>02B_1_6_1_split00_100Mb.fastq<br>02B_1_6_2_split00_100Mb.fastq                                                                                                                                                            | 1002.66                                                         |
| Ssaha     | SSaha/ssaha2 -solexa -skip 6 -pair 20,400 -outfile<br>02B_1_6_ssaha_100mb.sam -multi 1 -output sam -save<br>hs36k13s6 02B_1_6_1_split00_100Mb.fastq<br>02B_1_6_2_split00_100Mb.fastq                                                                                                                                 | 2693.94                                                         |
| Stampy    | Python2.6/bin/python stampy-1.0.12/stampy.py --bwa --<br>bwaoptions=-q10 hg18.fa -g hg18 -h hg18 --gapopen=40<br>--gapextend=3 --bwamaxmismatch=-1 --<br>readgroup=ID:02B,SM:exome,PL:illumina --solexa -f sam<br>-o stampy_02B_split_100mb.sam -M<br>02B_1_6_1_split00_100Mb.fastq<br>02B_1_6_2_split00_100Mb.fastq | 3025.63                                                         |
| Bfast     | /Apps/parallel/bfast/bin/bfast match -f hg_18.fa -n 1 -K 8 -<br>M 1280 -r 02B_1_6_1_split00_100Mb.fastq                                                                                                                                                                                                              | 2545.74                                                         |
|           | /Apps/parallel/bfast/bin/bfast match -f hg_18.fa -n 1 -K 8 -<br>M 1280 -r 02B_1_6_2_split00_100Mb.fastq                                                                                                                                                                                                              | 2583.42                                                         |
|           | /Apps/serial/bfast+bwa/bin/bfast localalign -f hg_18.fa -n<br>1 -M 1280 -U -1 02B_1_6_1_split00_100Mb.fastq.bmf -2<br>02B_1_6_2_split00_100Mb.fastq.bmf                                                                                                                                                              | 4263.84                                                         |
|           | /Apps/serial/bfast+bwa/bin/bfast postprocess -f hg_18.fa<br>-n 1 -i bfast.la_02B_1_6_split_12.baf -O 1                                                                                                                                                                                                               | 11011.78                                                        |
