# Supplementary material for: Customisation of the Exome Data Analysis Pipeline Using a Combinatorial Approach
Source: PubMed Central journal article supplement (PMC3253117; doi:10.1371/journal.pone.0030080), 2012-01-06
Supplement: pone.0030080.s007.pdf [file pone.0030080.s007.pdf]

Tables S3: Number of raw SNP calls, filtered SNP calls (based on variant quality and depth) and the constituent exonic SNPs after sureselect boundary filter for sample 02B.

| Aligner | Caller    | # of SNPs Called | # of SNPs after Filtering | No of Exonic SNPs |
|---------|-----------|------------------|---------------------------|-------------------|
| BWA     | Samtools  | 655274           | 46180                     | 6808              |
|         | GATK      | 604335           | -                         | 25753             |
|         | Freebayes | 16167543         | 162198                    | 104234            |
|         | Bambino   | 168188           | 42987                     | 20841             |
| BFAST   | Samtools  | 2263730          | 51059                     | 7429              |
|         | GATK      | 726383           | -                         | 24266             |
|         | Freebayes | 37500750         | 447855                    | 286229            |
|         | Bambino   | 218126           | 39531                     | 20742             |
| BOWTIE  | Samtools  | 186084           | 20988                     | 5463              |
|         | GATK      | 290261           | -                         | 23074             |
|         | Freebayes | 6076511          | 71147                     | 43142             |
|         | Bambino   | 65796            | 23088                     | 13825             |
| STAMPY  | Samtools  | 17255637         | 247568                    | 12915             |
|         | GATK      | 756284           | -                         | 25068             |
|         | Freebayes | 12439362         | 71111                     | 22215             |
|         | Bambino   | 139330           | 37810                     | 18977             |
| NovoMPI | Samtools  | 1099115          | 266897                    | 17430             |
|         | GATK      | 680079           | -                         | 26074             |
|         | Freebayes | 4657723          | 56288                     | 20539             |
|         | Bambino   | 175293           | 35685                     | 19131             |
| SMALT   | Samtools  | 1457032          | 76906                     | 7275              |
|         | GATK      | 651292           | -                         | 25335             |
|         | Freebayes | 19439907         | 214381                    | 121011            |
|         | Bambino   | 65796            | 23088                     | 13825             |
| SSAHA   | Samtools  | 1240774          | 74222                     | 7126              |
|         | GATK      | 670857           | -                         | 26453             |
|         | Freebayes | 18543594         | 178714                    | 114497            |
|         | Bambino   | 224508           | 46005                     | 21644             |
