# Supplementary material for: Customisation of the Exome Data Analysis Pipeline Using a Combinatorial Approach
Source: PubMed Central journal article supplement (PMC3253117; doi:10.1371/journal.pone.0030080), 2012-01-06
Supplement: pone.0030080.s008.pdf [file pone.0030080.s008.pdf]

Table S4: Number of raw SNP calls, filtered SNP calls (based on variant quality and depth) and the constituent exonic SNPs after sureselect boundary filter for sample 12L.

| Aligner | Caller    | # of SNPs Called | # of SNPs after Filtering | No of Exonic SNPs |
|---------|-----------|------------------|---------------------------|-------------------|
| BWA     | Samtools  | 1391002          | 60215                     | 7746              |
|         | GATK      | 610524           | -                         | 25766             |
|         | Freebayes | 22530966         | 224211                    | 145248            |
| BFAST   | Bambino   | 199482           | 43389                     | 20948             |
|         | Samtools  | 2776766          | 63946                     | 8007              |
|         | GATK      | 765903           | -                         | 23952             |
| BOWTIE  | Freebayes | 43915512         | 515969                    | 331744            |
|         | Bambino   | 253707           | 39383                     | 20258             |
|         | Samtools  | 482297           | 22729                     | 5400              |
| STAMPY  | GATK      | 290415           | -                         | 22069             |
|         | Freebayes | 8369362          | 74479                     | 46673             |
|         | Bambino   | 68012            | 20968                     | 12514             |
| NovoMPI | Samtools  | 17405717         | 286170                    | 13210             |
|         | GATK      | 813185           | -                         | 24822             |
|         | Freebayes | 13493572         | 75967                     | 21792             |
| SMALT   | Bambino   | 142409           | 35282                     | 17812             |
|         | Samtools  | 1210524          | 307889                    | 17739             |
|         | GATK      | 730492           | -                         | 25809             |
| SSAHA   | Freebayes | 5810605          | 59912                     | 19961             |
|         | Bambino   | 198114           | 35044                     | 18486             |
|         | Samtools  | 1967369          | 93105                     | 7905              |
| SSAHA   | GATK      | 700930           | -                         | 25049             |
|         | Freebayes | 26189757         | 270530                    | 151663            |
|         | Bambino   | 242723           | 39544                     | 19935             |
| SSAHA   | Samtools  | 1780227          | 90171                     | 7695              |
|         | GATK      | 728267           | -                         | 26299             |
|         | Freebayes | 25022907         | 220899                    | 142670            |
|         | Bambino   | 260772           | 46583                     | 21235             |
