# Supplementary material for: Customisation of the Exome Data Analysis Pipeline Using a Combinatorial Approach
Source: PubMed Central journal article supplement (PMC3253117; doi:10.1371/journal.pone.0030080), 2012-01-06
Supplement: pone.0030080.s009.pdf [file pone.0030080.s009.pdf]

Table S5: Number of raw SNP calls, filtered SNP calls (based on variant quality and depth) and the constituent exonic SNPs after sureselect boundary filter for sample 20T.

| Aligner | Caller    | # of SNPs Called | # of SNPs after Filtering | No of Exonic SNPs |
|---------|-----------|------------------|---------------------------|-------------------|
| BWA     | Samtools  | 818100           | 54159                     | 7104              |
|         | GATK      | 638918           | -                         | 25417             |
|         | Freebayes | 19720266         | 204875                    | 131000            |
|         | Bambino   | 185875           | 46598                     | 21336             |
| BFAST   | Samtools  | 2398445          | 61748                     | 7981              |
|         | GATK      | 711615           | -                         | 24183             |
|         | Freebayes | 39094993         | 411535                    | 264101            |
|         | Bambino   | 218322           | 41237                     | 20491             |
| BOWTIE  | Samtools  | 243165           | 23340                     | 5669              |
|         | GATK      | 317185           | -                         | 22848             |
|         | Freebayes | 7677818          | 84611                     | 51466             |
|         | Bambino   | 69374            | 24358                     | 13943             |
| STAMPY  | Samtools  | 13352476         | 266051                    | 14116             |
|         | GATK      | 759198           | -                         | 25432             |
|         | Freebayes | 11389360         | 72496                     | 20956             |
|         | Bambino   | 126940           | 37178                     | 18072             |
| NovoMPI | Samtools  | 1179066          | 280981                    | 17224             |
|         | GATK      | 688483           | -                         | 25711             |
|         | Freebayes | 5111684          | 58383                     | 19978             |
|         | Bambino   | 172007           | 36323                     | 18565             |
| SMALT   | Samtools  | 1648858          | 85194                     | 8080              |
|         | GATK      | 664296           | -                         | 25052             |
|         | Freebayes | 24110143         | 285608                    | 165389            |
|         | Bambino   | 214446           | 41855                     | 20579             |
| SSAHA   | Samtools  | 1445024          | 82976                     | 7832              |
|         | GATK      | 686781           | -                         | 26362             |
|         | Freebayes | 23038163         | 243536                    | 155998            |
|         | Bambino   | 231246           | 48785                     | 21914             |
