# Supplementary material for: Customisation of the Exome Data Analysis Pipeline Using a Combinatorial Approach
Source: PubMed Central journal article supplement (PMC3253117; doi:10.1371/journal.pone.0030080), 2012-01-06
Supplement: pone.0030080.s010.pdf [file pone.0030080.s010.pdf]

Table S6: Metrics after applying the filter of MAPQ filter =>30 with samtools (a), GATK (b), Freebayes (c) and Bambino (d).

a.

| Aligner | # of SNPs called | # of SNP after Filtering | No. of Exonic SNPs | No. of SNPs after OMNI2.5 comparison | ti/Tv |
|---------|------------------|--------------------------|--------------------|--------------------------------------|-------|
| Bwa     | 14653974         | 139807                   | 93346              | 11422                                | 0.33  |
| Smalt   | 17737046         | 198668                   | 114720             | 12153                                | 0.31  |
| Ssaha   | 16875126         | 166481                   | 108859             | 12107                                | 0.32  |
| Novo    | 4702554          | 59759                    | 20588              | 11474                                | 2.70  |

b.

| Aligner | # of SNPs called | # of SNPs after Filtering | # of Exonic SNPs | # of SNPs after OMNI2.5 comparison | Ti/Tv |
|---------|------------------|---------------------------|------------------|------------------------------------|-------|
| BWA     | 616700           | 38464                     | 6919             | 4087                               | 3.82  |
| Smalt   | 1352335          | 64585                     | 7483             | 4255                               | 3.54  |
| Ssaha   | 1073396          | 62192                     | 7587             | 4177                               | 3.46  |
| Novo    | 1123529          | 270370                    | 17381            | 9625                               | 3.23  |

c.

| Aligner | # of SNPs called | # of SNPs after Filtering | # of Exonic SNPs | # of SNPs after OMNI comparison | Ti/Tv |
|---------|------------------|---------------------------|------------------|---------------------------------|-------|
| BWA     | 122269           | 31832                     | 18607            | 10944                           | 2.62  |
| Smalt   | 152793           | 31415                     | 19031            | 11358                           | 2.7   |
| Ssaha   | 152751           | 34100                     | 19713            | 11362                           | 2.65  |
| Novo    | 181075           | 33337                     | 18682            | 11112                           | 2.9   |

d.

| Aligner | # of SNPs called | # of SNPs after Filtering | No. of SNPs after OMNI comparison | Ti/Tv |
|---------|------------------|---------------------------|-----------------------------------|-------|
| BWA     | 571120           | 24680                     | 13832                             | 2.835 |
| Smalt   | 577925           | 24928                     | 13914                             | 2.784 |
| Ssaha   | 623271           | 26163                     | 13941                             | 2.76  |
| Novo    | 634390           | 25449                     | 13906                             | 2.8   |
